# Supplementary material
Source: PubMed Central journal article supplement (PMC5792054)
Supplement: NIHMS922401-supplement-Suppl__Table_4.pdf [file NIHMS922401-supplement-Suppl__Table_4.pdf]

| Lagging Edge*     | Leading Edge*     |
|-------------------|-------------------|
| ACA               | $\alpha$ -actinin |
| Cortexillin I     | Arp3              |
| Cortexillin II II | Cofilin           |
| CynA              | Coronin           |
| DGAP1             | Crac              |
| MHCKC             | DockD             |
| Myosin II         | Dynacortin        |
| PakA              | Fimbrin           |
| PTEN              | LimC, D,ED, E     |
| TalA              | Mek1              |
| TalB              | MHCKA             |
|                   | MyoB, D           |
|                   | Nf1               |
|                   | Nhe1              |
|                   | PakB              |
|                   | PhdA              |
|                   | Phg2              |
|                   | PI3K2             |
|                   | PKBA              |
|                   | PKBR1**           |
|                   | RacGEF1           |
|                   | Rap1              |
|                   | RapGAP1,3         |
|                   | Ras**             |
|                   | Sca               |
|                   | Scar              |
|                   | sGC               |
|                   | TorC2**           |

\*See supporting references in Table 3.

\*\*Activated Form.
