# Supplementary material
Source: PubMed Central journal article supplement (PMC5792054)
Supplement: NIHMS922401-supplement-Suppl__Table_5.pdf [file NIHMS922401-supplement-Suppl__Table_5.pdf]

Table 5: Nature and Property of Inhibitors

| Module | Property                             | Time Scale    | Putative components and mechanisms                                              |                                                                                                         |
|--------|--------------------------------------|---------------|---------------------------------------------------------------------------------|---------------------------------------------------------------------------------------------------------|
|        |                                      |               | Excitation                                                                      | Inhibition                                                                                              |
| LEGI   | Adaptation & Gradient Sensing        | ~3-5 minutes  | G-protein subunits, G $\beta\gamma$ (Huang et al., 2013)                        | GPCR, G-protein-independent (Tang et al., 2014)                                                         |
| STEN   | Signal integration and amplification | ~45 seconds   | Mutual inhibition between Ras GTPases and back activities(Miao et al 2017 ????) | PKB substrates ((Sasaki and Firtel, 2005))                                                              |
| CON    | Actin protrusions                    | ~5-10 seconds | SCAR/Wave (Pollitt and Insall, 2009)                                            | Coronin (de Hostos et al., 1993)                                                                        |
| POL    | Polarization                         | ~5-10 minutes | Cytoskeletal architecture (Wang et al., 2014)                                   | Membrane (Houk et al., 2012)/cortical (Kabacoff et al., 2007)tension, Cytoskeleton (Lange et al., 2016) |

de Hostos, E.L. et al. 1993 Dictyostelium mutants lacking the cytoskeletal protein coronin are defective in cytokinesis and cell motility. *J Cell Biol*, **120**, 163-173

Houk, A.R. et al. 2012 Membrane tension maintains cell polarity by confining signals to the leading edge during neutrophil migration. *Cell*, **148**, 175-188

Huang, C.H. et al. 2013 An excitable signal integrator couples to an idling cytoskeletal oscillator to drive cell migration. *Nat Cell Biol*, **15**, 1307-1316

Kabacoff, C. et al. 2007 Dynacortin facilitates polarization of chemotaxing cells. *BMC Biol*, **5**, 53

Lange, M. et al. 2016 Local Ras activation, PTEN pattern, and global actin flow in the chemotactic responses of oversized cells. *J Cell Sci*, **129**, 3462-3472

Pollitt, A.Y. & Insall, R.H. 2009 Loss of Dictyostelium HSPC300 causes a scar-like phenotype and loss of SCAR protein. *BMC Cell Biol*, **10**, 13

Sasaki, A.T. & Firtel, R.A. 2005 Finding the way: directional sensing and cell polarization through Ras signalling. *Novartis Found Symp*, **269**, 73-87; discussion 87

Tang, M. et al. 2014 Evolutionarily conserved coupling of adaptive and excitable networks mediates eukaryotic chemotaxis. *Nat Commun*, **5**, 5175

Wang, M.J. et al. 2014 The directional response of chemotactic cells depends on a balance between cytoskeletal architecture and the external gradient. *Cell Rep*, **9**, 1110-1121
