# Supplementary material
Source: PubMed Central journal article supplement (PMC5792054)

Supplementary Figure 1

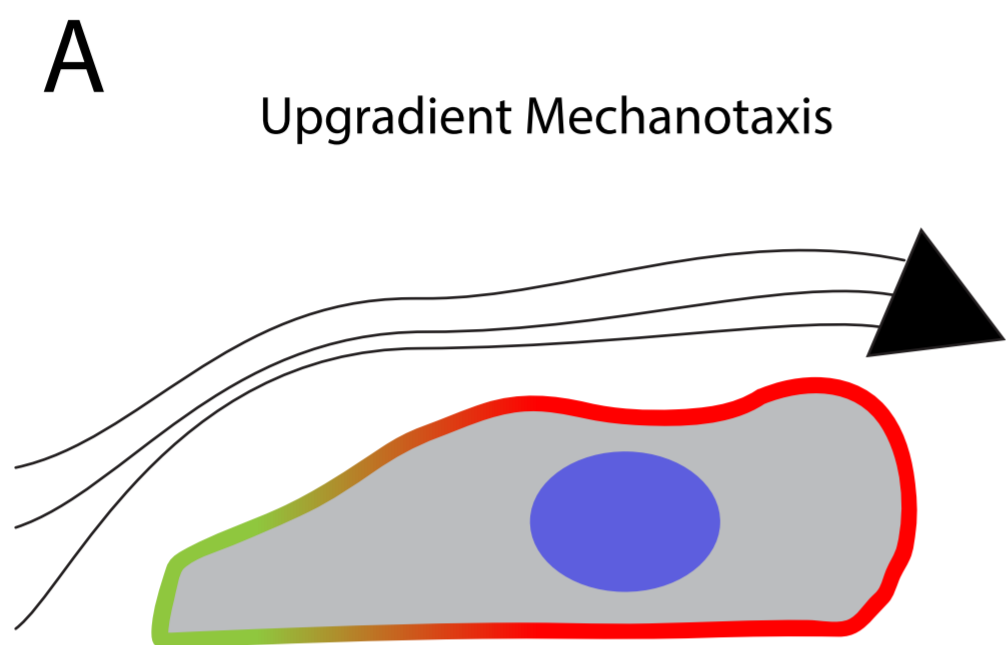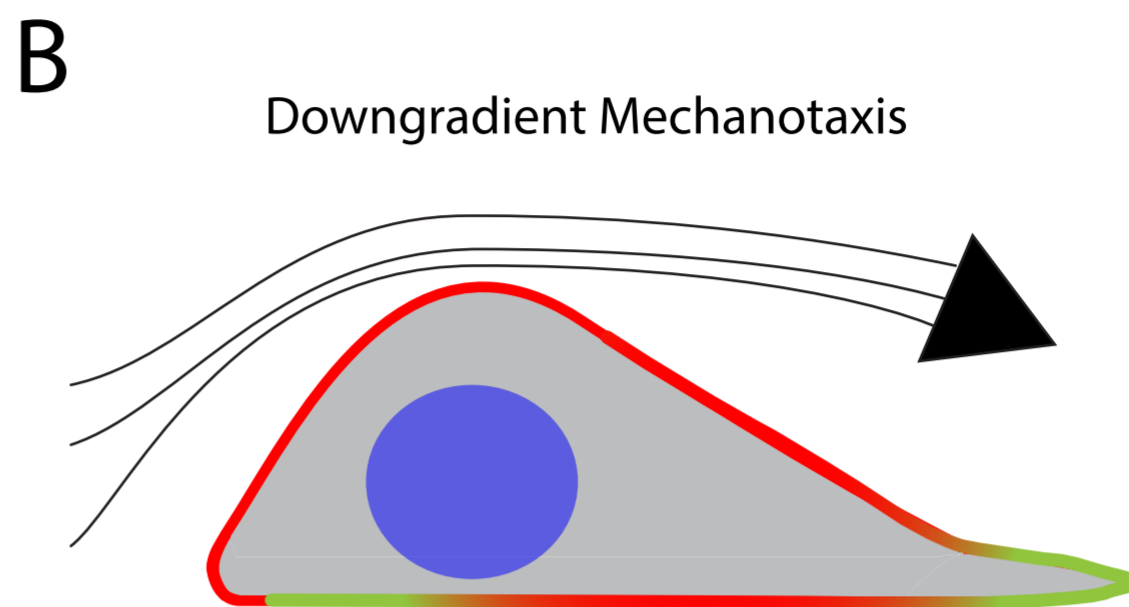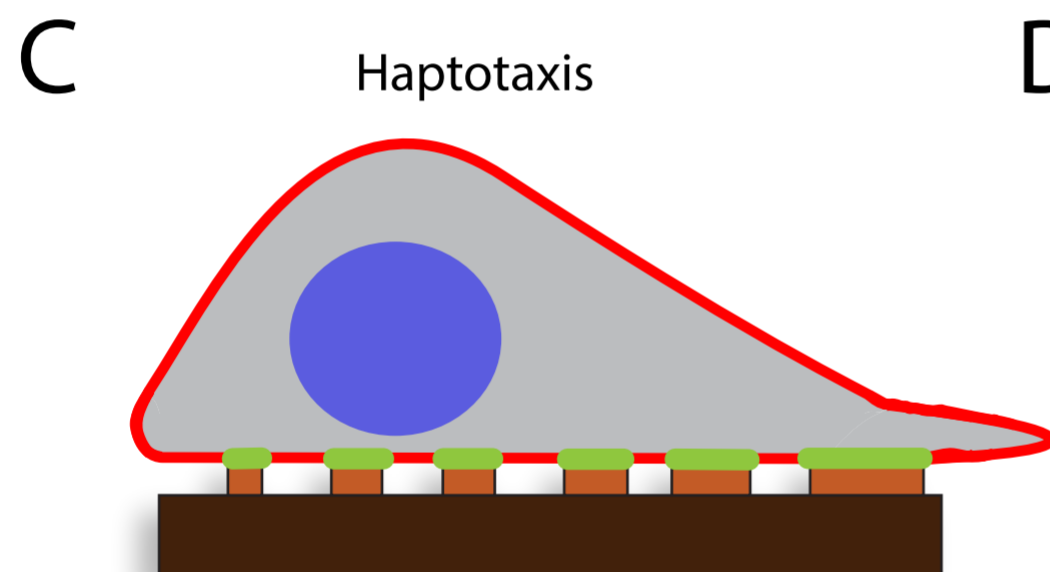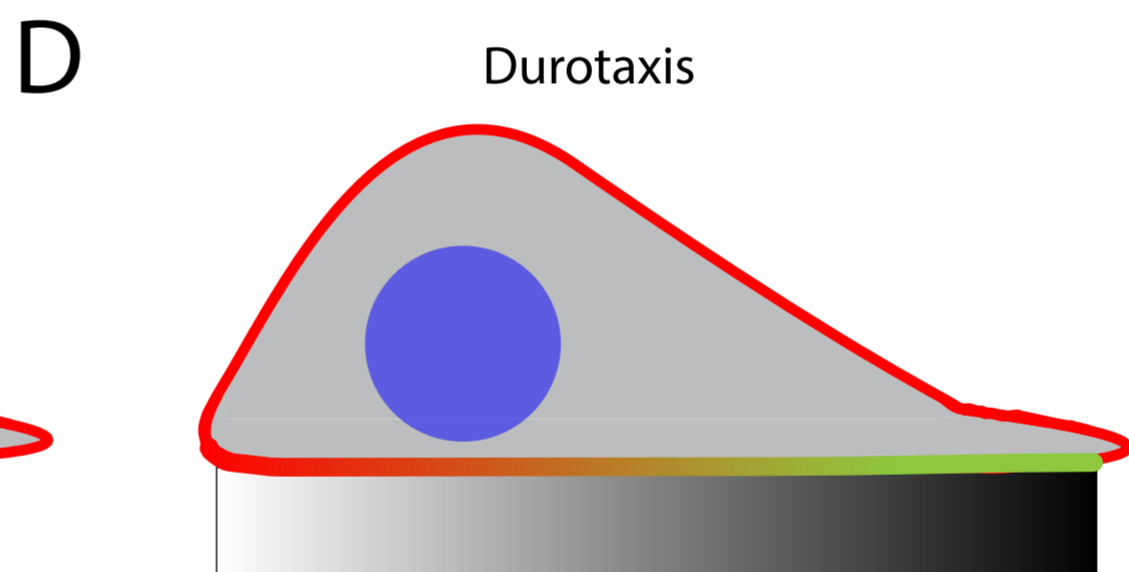

Supplement: NIHMS922401-supplement-Suppl__Figure_1.pdf [file NIHMS922401-supplement-Suppl__Figure_1.pdf]
